# Supplementary material
Source: publisher site journal article supplement (https://www.dovepress.com/article/288841)

**Supplementary material**

**Supplementary Figure S1. HSYA induced the expression of MYC in glioma cells**

(A) The expression of MYC in LN-229 and U-251MG cells after treatment with different doses of HSYA (25, 50, 100 μM) for 48 h was detected by Western blot, β-actin was an internal control. The expression of MYC in glioma cells was increased by HSYA, and 25 μM HSYA was used for later experiments. (B) The expression of MYC in LN-229 and U-251MG cells after treatment with 25 μM HSYA for different time (24, 48, 72h) was detected by Western blot, GAPDH was an internal control. The level of MYC in LN-229 cells were increased at all time points, and the level of MYC in U-251MG cells were increased at 24 h and 48 h. (C) The silencing of MYC after transfection with three siRNA sin the LN-229 and U-251MG cells was evaluated for RT-qPCR, β-actin was an internal control. The siMYC-1, siMYC-2, and siMYC-3 were all significantly decreased the level of MYC. N=3. (***P* < 0.01, ****P* < 0.001, vs. 0 μM; ++*P* < 0.01, +++*P* < 0.001, vs. 0 h; ###*P* < 0.001, vs. siNC). (HSYA: Hydroxysafflor Yellow A, siMYC: siRNA targeting MYC, siNC: siRNA negative control)


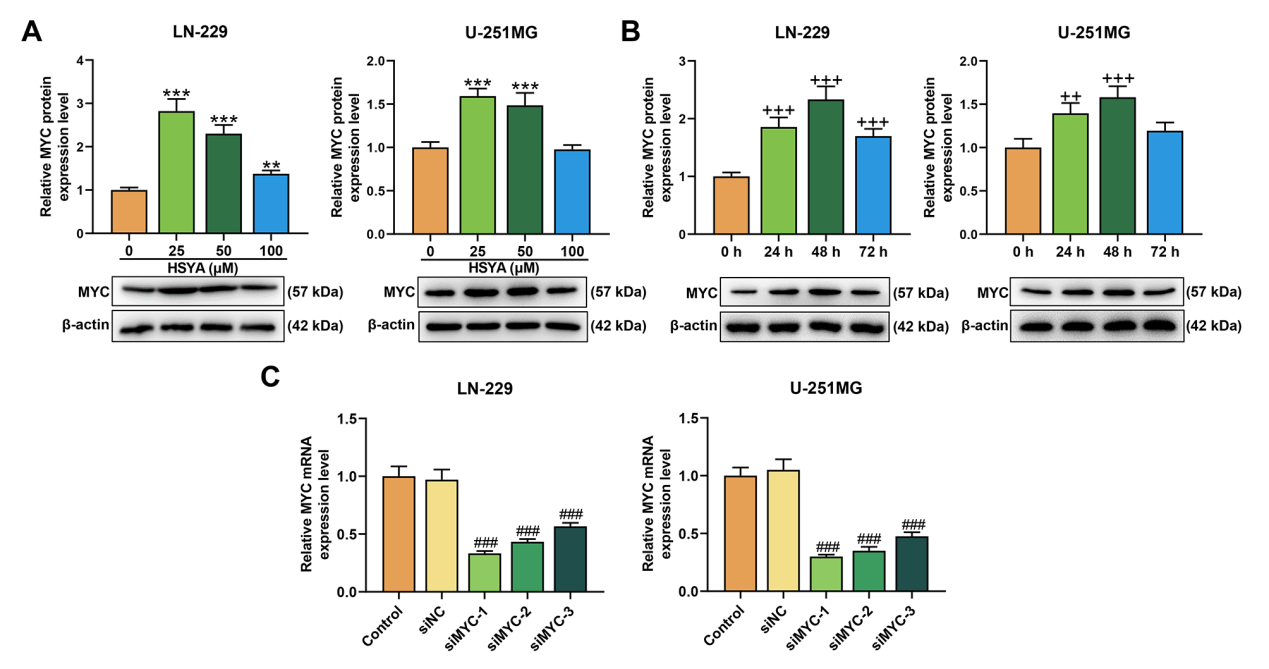

Supplement: Supplementary file 1 [file get_supplementary_file.php]
